# Supplementary material for: Genomic Analysis of Lymphoma Risk in Bullmastiff Dogs
Source: MDPI journal article supplement (doi:10.3390/vetsci10120703), 2023-12-14
Supplement: s1 [file s1]

Figure S1: Manhattan plots of SNP association analyses on CFA13 (A), CFA33 (B), CFA36 (C) and CFA 38 (D).

A

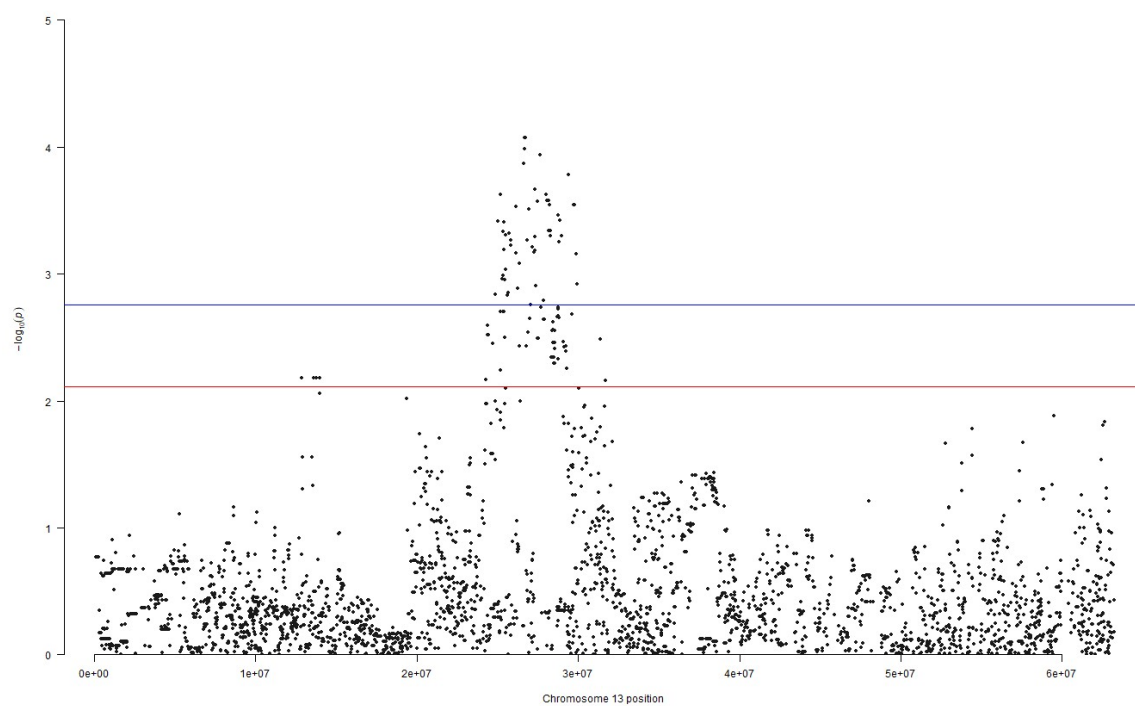

**B**

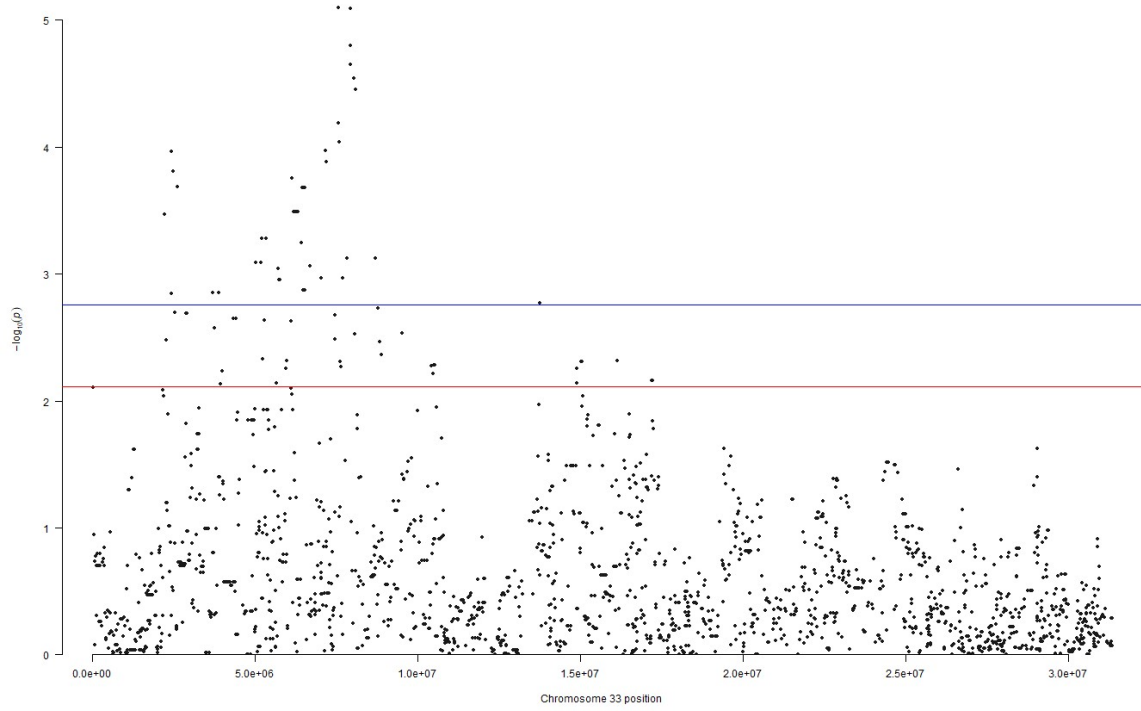

C

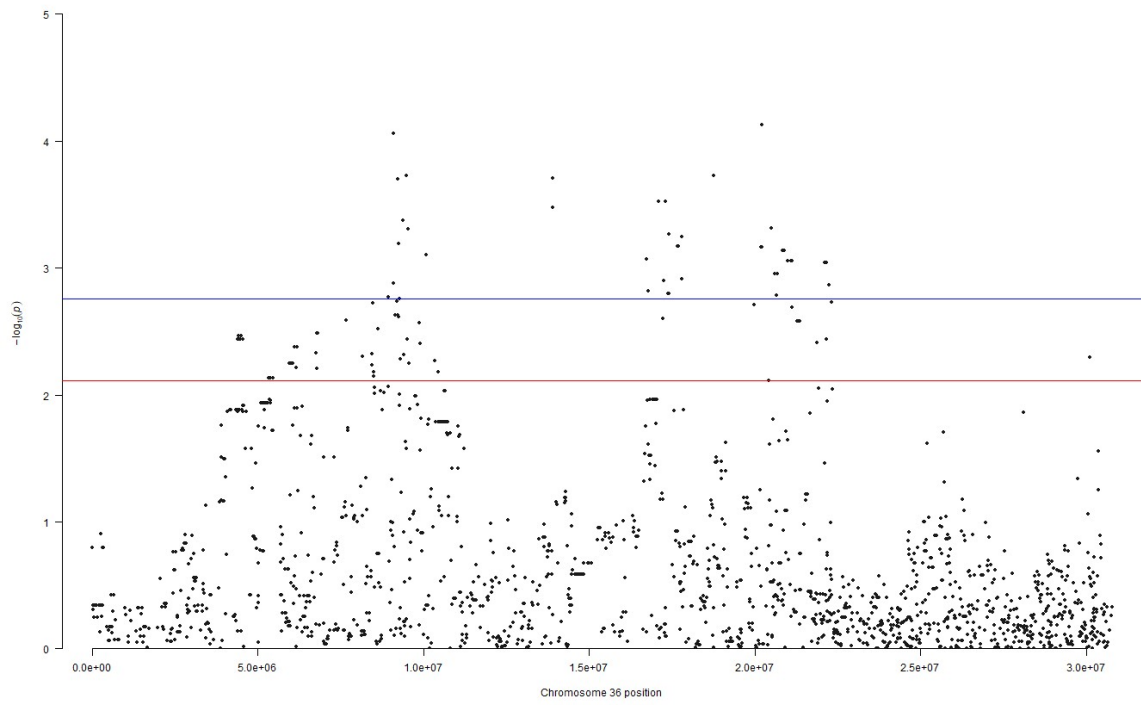

**D**

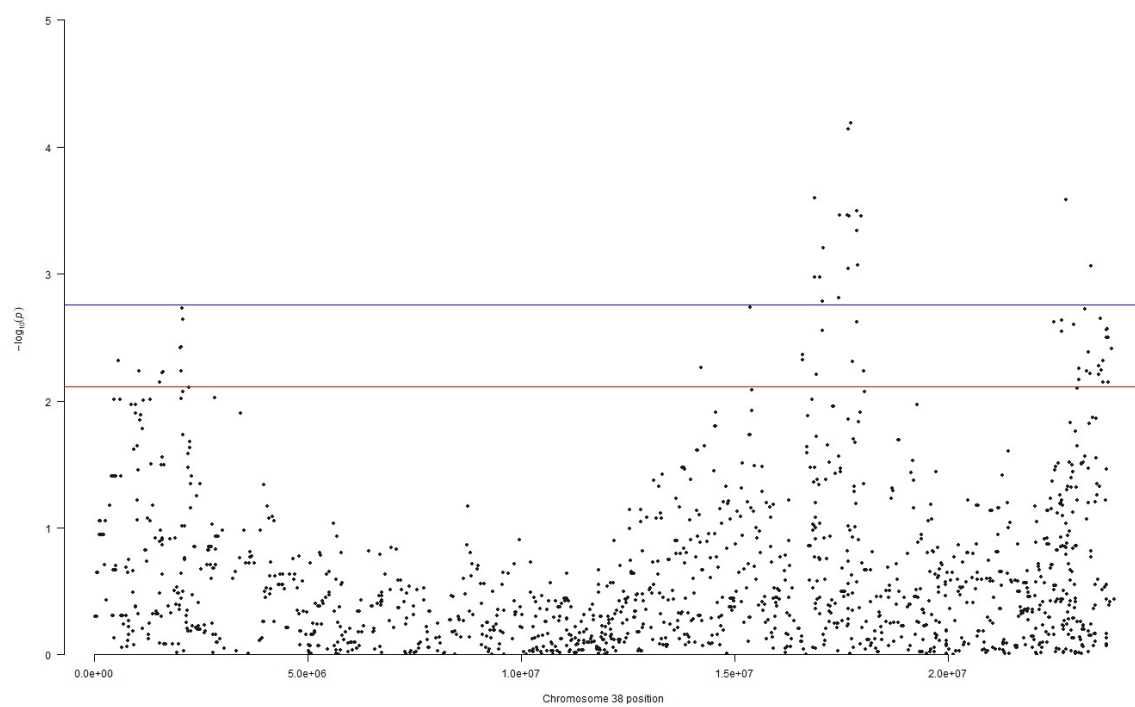

Table S1: Details of top associated SNPs

| CHR | BP       | P.value | A1 | A2 | Freq | b     | SE   |
|-----|----------|---------|----|----|------|-------|------|
| 33  | 8119663  | 0.00000 | C  | A  | 0.23 | 0.19  | 0.04 |
| 33  | 8104361  | 0.00000 | G  | A  | 0.25 | 0.18  | 0.03 |
| 33  | 7948722  | 0.00000 | G  | A  | 0.25 | 0.18  | 0.03 |
| 33  | 7824270  | 0.00000 | A  | G  | 0.25 | 0.17  | 0.03 |
| 33  | 7720211  | 0.00000 | A  | G  | 0.19 | 0.18  | 0.04 |
| 33  | 7737742  | 0.00000 | A  | G  | 0.19 | 0.18  | 0.04 |
| 33  | 7577636  | 0.00001 | C  | A  | 0.32 | 0.14  | 0.03 |
| 33  | 7944060  | 0.00001 | G  | A  | 0.21 | 0.17  | 0.04 |
| 4   | 33686301 | 0.00001 | A  | G  | 0.26 | 0.18  | 0.04 |
| 2   | 79804014 | 0.00001 | A  | C  | 0.33 | 0.12  | 0.03 |
| 33  | 7947940  | 0.00002 | A  | C  | 0.21 | 0.16  | 0.04 |
| 33  | 7927920  | 0.00002 | G  | A  | 0.31 | 0.14  | 0.03 |
| 33  | 8047765  | 0.00003 | G  | C  | 0.30 | 0.13  | 0.03 |
| 33  | 8089901  | 0.00004 | A  | G  | 0.32 | 0.13  | 0.03 |
| 33  | 7565433  | 0.00006 | A  | G  | 0.15 | 0.16  | 0.04 |
| 38  | 17725938 | 0.00006 | A  | G  | 0.17 | 0.16  | 0.04 |
| 38  | 17665758 | 0.00007 | A  | G  | 0.14 | 0.17  | 0.04 |
| 38  | 17666204 | 0.00007 | A  | G  | 0.14 | 0.17  | 0.04 |
| 38  | 17668116 | 0.00007 | A  | G  | 0.14 | 0.17  | 0.04 |
| 36  | 20206887 | 0.00007 | A  | G  | 0.06 | 0.25  | 0.06 |
| 13  | 26684157 | 0.00008 | G  | A  | 0.42 | -0.12 | 0.03 |
| 13  | 26708681 | 0.00008 | G  | A  | 0.42 | -0.12 | 0.03 |
| 36  | 9081255  | 0.00009 | G  | A  | 0.22 | 0.14  | 0.04 |
| 33  | 7593370  | 0.00009 | G  | A  | 0.26 | 0.13  | 0.03 |
| 13  | 26693097 | 0.00010 | G  | A  | 0.42 | -0.12 | 0.03 |
| 33  | 7180525  | 0.00011 | A  | G  | 0.28 | 0.13  | 0.03 |
| 33  | 2441102  | 0.00011 | G  | A  | 0.18 | 0.15  | 0.04 |
| 13  | 27637942 | 0.00012 | A  | G  | 0.42 | 0.12  | 0.03 |
| 33  | 7195565  | 0.00013 | G  | A  | 0.15 | 0.16  | 0.04 |
| 13  | 26648648 | 0.00013 | G  | A  | 0.42 | -0.12 | 0.03 |
| 33  | 2477174  | 0.00016 | C  | A  | 0.18 | 0.15  | 0.04 |
| 13  | 29380799 | 0.00016 | C  | G  | 0.13 | 0.16  | 0.04 |
| 13  | 29383945 | 0.00016 | A  | G  | 0.13 | 0.16  | 0.04 |
| 13  | 29393693 | 0.00016 | G  | A  | 0.13 | 0.16  | 0.04 |
| 13  | 29395323 | 0.00016 | G  | A  | 0.13 | 0.16  | 0.04 |
| 13  | 29404434 | 0.00016 | A  | G  | 0.13 | 0.16  | 0.04 |
| 33  | 6142107  | 0.00018 | A  | G  | 0.21 | 0.14  | 0.04 |
| 36  | 9482475  | 0.00019 | A  | G  | 0.13 | 0.17  | 0.04 |
| 36  | 18758528 | 0.00019 | C  | A  | 0.06 | 0.23  | 0.06 |
| 36  | 18766991 | 0.00019 | G  | A  | 0.06 | 0.23  | 0.06 |
| 36  | 13909161 | 0.00020 | C  | A  | 0.13 | 0.16  | 0.04 |
| 36  | 9216972  | 0.00020 | G  | A  | 0.23 | 0.13  | 0.04 |
| 33  | 2626063  | 0.00020 | A  | G  | 0.19 | 0.14  | 0.04 |
| 33  | 6452002  | 0.00021 | A  | G  | 0.15 | 0.15  | 0.04 |
| 33  | 6467209  | 0.00021 | G  | A  | 0.15 | 0.15  | 0.04 |
| 33  | 6506969  | 0.00021 | A  | G  | 0.15 | 0.15  | 0.04 |
| 33  | 6531971  | 0.00021 | A  | G  | 0.15 | 0.15  | 0.04 |
| 13  | 27331125 | 0.00022 | G  | A  | 0.17 | 0.15  | 0.04 |
| 13  | 25208544 | 0.00023 | A  | C  | 0.50 | -0.11 | 0.03 |
| 13  | 28029410 | 0.00024 | G  | A  | 0.46 | 0.11  | 0.03 |
| 38  | 16878192 | 0.00025 | A  | G  | 0.21 | 0.13  | 0.04 |

|    |          |         |   |   |      |       |      |
|----|----------|---------|---|---|------|-------|------|
| 38 | 22764291 | 0.00026 | A | C | 0.08 | 0.21  | 0.06 |
| 13 | 28197615 | 0.00026 | A | G | 0.46 | 0.11  | 0.03 |
| 13 | 28075353 | 0.00027 | G | A | 0.46 | 0.11  | 0.03 |
| 13 | 27466313 | 0.00027 | A | G | 0.48 | 0.11  | 0.03 |
| 13 | 29743592 | 0.00029 | G | A | 0.48 | -0.11 | 0.03 |
| 13 | 29776513 | 0.00029 | A | G | 0.48 | -0.11 | 0.03 |
| 13 | 28223435 | 0.00029 | A | G | 0.47 | 0.11  | 0.03 |
| 13 | 26152730 | 0.00029 | A | G | 0.50 | -0.11 | 0.03 |
| 36 | 17098631 | 0.00030 | G | A | 0.07 | 0.22  | 0.06 |
| 36 | 17289324 | 0.00030 | A | G | 0.07 | 0.22  | 0.06 |
| 13 | 26935106 | 0.00031 | A | C | 0.42 | -0.11 | 0.03 |
| 38 | 17858516 | 0.00032 | G | A | 0.22 | 0.13  | 0.04 |
| 33 | 6181465  | 0.00032 | G | A | 0.15 | 0.14  | 0.04 |
| 33 | 6183488  | 0.00032 | G | A | 0.15 | 0.14  | 0.04 |
| 33 | 6196948  | 0.00032 | A | G | 0.15 | 0.14  | 0.04 |
| 33 | 6229975  | 0.00032 | G | A | 0.15 | 0.14  | 0.04 |
| 33 | 6283136  | 0.00032 | A | G | 0.15 | 0.14  | 0.04 |
| 33 | 6311359  | 0.00032 | A | G | 0.15 | 0.14  | 0.04 |
| 36 | 13909204 | 0.00034 | G | C | 0.14 | 0.14  | 0.04 |
| 33 | 2212800  | 0.00034 | A | G | 0.21 | 0.13  | 0.04 |
| 33 | 2220530  | 0.00034 | A | G | 0.21 | 0.13  | 0.04 |
| 13 | 28760300 | 0.00034 | G | A | 0.49 | -0.11 | 0.03 |
| 38 | 17470175 | 0.00035 | G | A | 0.15 | 0.15  | 0.04 |
| 38 | 17636562 | 0.00035 | G | A | 0.15 | 0.15  | 0.04 |
| 38 | 17679584 | 0.00035 | G | A | 0.23 | 0.13  | 0.04 |
| 38 | 17970086 | 0.00035 | G | A | 0.21 | 0.13  | 0.04 |
| 13 | 28842831 | 0.00038 | A | G | 0.48 | -0.11 | 0.03 |
| 13 | 28860446 | 0.00038 | C | A | 0.48 | -0.11 | 0.03 |
| 13 | 28862074 | 0.00038 | A | C | 0.48 | -0.11 | 0.03 |
| 13 | 25008163 | 0.00038 | A | G | 0.44 | -0.11 | 0.03 |
| 13 | 25423168 | 0.00039 | G | A | 0.50 | 0.11  | 0.03 |
| 13 | 25423547 | 0.00039 | T | A | 0.50 | 0.11  | 0.03 |
| 36 | 9376340  | 0.00042 | A | G | 0.27 | 0.12  | 0.03 |
| 38 | 17874461 | 0.00045 | A | C | 0.29 | 0.11  | 0.03 |
| 13 | 28176188 | 0.00046 | A | G | 0.46 | 0.11  | 0.03 |
| 13 | 28282194 | 0.00046 | G | A | 0.46 | 0.11  | 0.03 |
| 13 | 25341980 | 0.00046 | A | G | 0.50 | -0.10 | 0.03 |
| 13 | 25738705 | 0.00048 | G | A | 0.17 | 0.14  | 0.04 |
| 36 | 20496290 | 0.00048 | A | G | 0.05 | 0.23  | 0.07 |
| 36 | 9543177  | 0.00049 | A | G | 0.13 | 0.16  | 0.05 |
| 13 | 25519392 | 0.00049 | A | G | 0.44 | 0.11  | 0.03 |
| 13 | 28300663 | 0.00050 | A | G | 0.46 | 0.11  | 0.03 |
| 13 | 28974415 | 0.00050 | G | C | 0.47 | 0.10  | 0.03 |
| 13 | 27313776 | 0.00051 | G | A | 0.17 | 0.14  | 0.04 |
| 13 | 27318143 | 0.00051 | G | A | 0.17 | 0.14  | 0.04 |
| 33 | 5210927  | 0.00052 | A | G | 0.14 | 0.15  | 0.04 |
| 33 | 5222649  | 0.00052 | G | A | 0.14 | 0.15  | 0.04 |
| 33 | 5350151  | 0.00052 | A | C | 0.14 | 0.15  | 0.04 |

|    |          |         |   |   |      |       |      |
|----|----------|---------|---|---|------|-------|------|
| 13 | 26840540 | 0.00054 | G | A | 0.49 | -0.11 | 0.03 |
| 13 | 25829840 | 0.00054 | G | A | 0.46 | 0.11  | 0.03 |

Table S2: Details of top associated SNPs in analysis of young dogs

| CHR | BP       | P.value | A1 | A2 | Freq | b     | SE   |
|-----|----------|---------|----|----|------|-------|------|
| 33  | 8104361  | 0.00000 | G  | A  | 0.28 | 0.30  | 0.06 |
| 33  | 8119663  | 0.00000 | C  | A  | 0.25 | 0.30  | 0.06 |
| 33  | 7824270  | 0.00001 | A  | G  | 0.28 | 0.28  | 0.06 |
| 13  | 25530619 | 0.00001 | G  | A  | 0.43 | 0.26  | 0.06 |
| 13  | 25423168 | 0.00001 | A  | G  | 0.49 | -0.25 | 0.06 |
| 13  | 26152730 | 0.00001 | A  | G  | 0.49 | -0.25 | 0.06 |
| 13  | 25423080 | 0.00001 | G  | C  | 0.43 | 0.26  | 0.06 |
| 13  | 25423547 | 0.00001 | A  | T  | 0.49 | -0.25 | 0.06 |
| 13  | 25341980 | 0.00002 | A  | G  | 0.49 | -0.24 | 0.06 |
| 13  | 25519392 | 0.00002 | A  | G  | 0.44 | 0.25  | 0.06 |
| 13  | 28029410 | 0.00003 | G  | A  | 0.42 | 0.25  | 0.06 |
| 33  | 7737742  | 0.00003 | A  | G  | 0.19 | 0.28  | 0.07 |
| 13  | 25829840 | 0.00003 | G  | A  | 0.43 | 0.24  | 0.06 |
| 13  | 25690710 | 0.00003 | A  | G  | 0.43 | -0.24 | 0.06 |
| 13  | 28075353 | 0.00003 | G  | A  | 0.42 | 0.25  | 0.06 |
| 13  | 28282194 | 0.00003 | G  | A  | 0.42 | 0.25  | 0.06 |
| 13  | 26343261 | 0.00003 | A  | T  | 0.48 | -0.23 | 0.06 |
| 13  | 25208544 | 0.00003 | A  | C  | 0.48 | -0.23 | 0.06 |
| 13  | 25842733 | 0.00003 | T  | A  | 0.44 | 0.24  | 0.06 |
| 13  | 26230261 | 0.00004 | A  | G  | 0.44 | -0.23 | 0.06 |
| 13  | 25346282 | 0.00004 | A  | G  | 0.43 | -0.23 | 0.06 |
| 13  | 28223435 | 0.00004 | A  | G  | 0.43 | 0.25  | 0.06 |
| 13  | 27637942 | 0.00005 | A  | G  | 0.42 | 0.24  | 0.06 |
| 13  | 26354649 | 0.00005 | G  | A  | 0.48 | -0.23 | 0.06 |
| 13  | 26684157 | 0.00006 | G  | A  | 0.44 | -0.24 | 0.06 |
| 13  | 28176188 | 0.00007 | A  | G  | 0.43 | 0.24  | 0.06 |
| 13  | 28197615 | 0.00007 | A  | G  | 0.43 | 0.24  | 0.06 |
| 13  | 26935106 | 0.00007 | A  | C  | 0.45 | -0.23 | 0.06 |
| 13  | 28300663 | 0.00008 | A  | G  | 0.44 | 0.24  | 0.06 |
| 13  | 26708681 | 0.00008 | G  | A  | 0.44 | -0.23 | 0.06 |



Table S3. Breeds used as reference in CSS analysis with low risk of lymphoma.

| Breed                     | Breed Group      | Lymphoma Risk (OR) | Sample Size |
|---------------------------|------------------|--------------------|-------------|
| American Hairless Terrier | American_Terrier | 0.2                | 78          |
| Rat Terrier               |                  | 0.2                |             |
| Toy Fox Terrier           |                  | 0.2                |             |
| Chihuahua                 | American_Toy     | 0.2                |             |
| Chinese Crested           |                  | 0.2                | 302         |
| Japanese Chin             | Asian_Toy        | 0.3                |             |
| Lhasa Apso                |                  | 0.3                |             |
| Pekingese                 |                  | 0.3                |             |
| Shih Tzu                  |                  | 0.3                |             |
| Tibetan Spaniel           |                  | 0.3                |             |
| Eurasier                  | Eurasier         | 0.3                |             |
| Finnish Spitz             | Finnish_Spitz    | 0.3                |             |
| Poodle Miniature          | Poodle           | 0.3                |             |
| Poodle Standard           |                  | 0.3                |             |
| Poodle Toy                |                  | 0.3                |             |
| Standard Poodle           |                  | 0.3                |             |
| Samoyed                   | Samoyed          | 0.3                |             |
| Tibetan Terrier           | Tibetan_Terrier  | 0.3                |             |
| Tibetan mastiff           | Asian_Spitz      | 0.5                | 156         |
| Tibetan_mastiff           |                  | 0.5                |             |

|                      |     |  |
|----------------------|-----|--|
| Akita                | 0.5 |  |
| Alaskan Malamute     | 0.5 |  |
| Greenland Sledge Dog | 0.5 |  |
| Shiba Inu            | 0.5 |  |
| Siberian Husky       | 0.5 |  |
| Xigou                | 0.5 |  |

Table S4: Top genomic regions detected by Composite selection signals analysis in lymphoma affected Bullmastiff dogs.

| Chromosome | Location (Mb) | Significant SNPs |
|------------|---------------|------------------|
| 1          | 50.91-52.86   | 13               |
| 1          | 53.17-54.95   | 33               |
| 1          | 59.73-60.85   | 5                |
| 3          | 7.81-8.97     | 7                |
| 3          | 73.1-75.63    | 47               |
| 3          | 75.93-78.85   | 55               |
| 5          | 62.3-63.9     | 20               |
| 7          | 20.22-21.42   | 8                |
| 7          | 60.9-62.17    | 13               |
| 8          | 57.85-59.48   | 4                |
| 9          | 44.58-46.33   | 19               |
| 10         | 4.94-6.39     | 8                |
| 10         | 6.59-9.47     | 24               |
| 18         | 8.23-10.41    | 10               |
| 18         | 24.84-26.36   | 20               |
| 20         | 29.92-30.89   | 4                |
| 22         | 27.83-28.96   | 8                |
| 26         | 23.67-24.64   | 10               |
| 30         | 19.25-20.64   | 17               |
| 32         | 3.73-5.64     | 36               |
